# Supplementary material for: Exploiting rice industry wastewater for more sustainable sunlight-driven photocatalytic hydrogen production using a graphitic carbon nitride polymorph
Source: Royal Society of Chemistry journal article supplement (doi:10.1039/d4su00567h), 2025-01-01
Supplement: d4su00567h1.pdf [file d4su00567h1.pdf]

### Supplementary Information

#### Exploiting rice industry wastewater for a more sustainable sunlight-driven photocatalytic hydrogen production using a graphitic carbon nitride polymorph

Petra Bianchini<sup>a</sup>, Antonella Profumo<sup>a</sup>, Lorenzo Cerri<sup>b</sup>, Costanza Tedesco<sup>a</sup>, Lorenzo Malavasi<sup>a</sup> and Andrea Speltini<sup>\*a</sup>

<sup>a</sup>Department of Chemistry, University of Pavia, via Taramelli 12, 27100 Pavia, Italy. E-mail: andrea.speltini@unipv.it

<sup>b</sup>Riso Scotti S.p.a., via Scotti 2, 27100 Pavia, Italy

**Table S1** Chemical and physical-chemical parameters of the rice industry wastewater.

|                                                       |       |
|-------------------------------------------------------|-------|
| pH                                                    | 4.31  |
| $\chi_{25^\circ\text{C}}$ ( $\mu\text{S}/\text{cm}$ ) | 392   |
| $\text{Cl}^-$ (mg/L)                                  | 3.5   |
| $\text{NO}_3^-$ (mg/L)                                | < 0.5 |
| $\text{SO}_4^{2-}$ (mg/L)                             | 1.3   |
| $\text{F}^-$ (mg/L)                                   | < 0.1 |
| $\text{Ca}^{2+}$ (mg/L)                               | 37.7  |
| $\text{Mg}^{2+}$ (mg/L)                               | 10.1  |
| $\text{Sr}^{2+}$ (mg/L)                               | 0.14  |
| $\text{Na}^+$ (mg/L)                                  | 14.6  |
| $\text{K}^+$ (mg/L)                                   | 5.8   |
| $\text{SiO}_2$ (mg/L)                                 | 29.1  |
| Fe (mg/L)                                             | 0.16  |
| Mn (mg/L)                                             | 0.02  |
| COD (mg/L)                                            | 4650  |
| Glucose (mg/L)                                        | 1540  |
| Acetic acid (mg/L)                                    | 123   |
| Formic acid (mg/L)                                    | 49    |
| Suspended solids (g/L)                                | 2.8   |

**Table S2** Experimental domain for the 2<sup>3</sup> factorial design in glucose standard solution.

|                                                    | Levels |     |
|----------------------------------------------------|--------|-----|
|                                                    | -1     | +1  |
| Glucose concentration (M), $x_1$                   | 0.025  | 0.2 |
| Catalyst concentration (g L <sup>-1</sup> ), $x_2$ | 0.5    | 2   |
| Pt loading (wt%), $x_3$                            | 0.5    | 3   |

| Exp.# | $x_1$ , glucose concentration (M) | $x_2$ , catalyst concentration (g/L) | $x_3$ , Pt loading (wt%) | HER  |
|-------|-----------------------------------|--------------------------------------|--------------------------|------|
| 1     | 0.025                             | 0.5                                  | 0.5                      | 56   |
| 2     | 0.2                               | 0.5                                  | 0.5                      | 69   |
| 3     | 0.025                             | 2                                    | 0.5                      | 125  |
| 4     | 0.2                               | 2                                    | 0.5                      | 502  |
| 5     | 0.025                             | 0.5                                  | 3                        | 328  |
| 6     | 0.2                               | 0.5                                  | 3                        | 1028 |
| 7     | 0.025                             | 2                                    | 3                        | 16   |
| 8     | 0.2                               | 2                                    | 3                        | 263  |

**Table S3** Experimental plan and mean HER ( $n=2$ ) observed for each experiment in glucose standard solution.<sup>a</sup>

<sup>a</sup> the model, elaborated on these experimental data, is:  $HER = 298 + 167x_1 - 72x_2 + 110x_3 - 11x_1x_2 + 70x_1x_3 - 197x_2x_3$ ; at the test point [ $x_1 = 0$ ;  $x_2 = 0$ ;  $x_3 = 0$ ], which means 0.1125 M, 1.25 g L<sup>-1</sup> catalyst, 1.75 wt% Pt, a HER of  $320 \pm 28 \mu\text{moles g}^{-1} \text{h}^{-1}$  ( $p=0.05$ ,  $n=4$ ) was experimentally obtained, not statistically different from the predicted value ( $298 \mu\text{moles g}^{-1} \text{h}^{-1}$ ), therefore the model is validated.

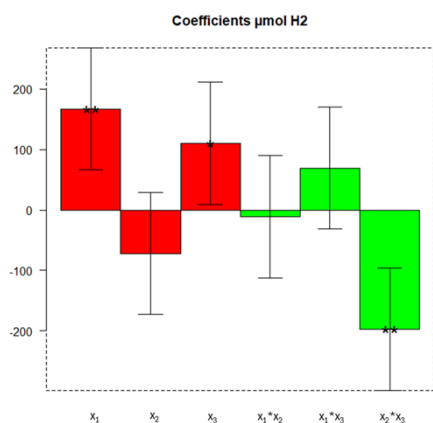**Fig. S1** Plots of the coefficients of the model where the stars indicate the significance of the coefficients (\* $p < 0.05$ , \*\* $p < 0.01$ , \*\*\* $p < 0.001$ ), while error bars indicate the confidence intervals ( $p = 0.05$ ).

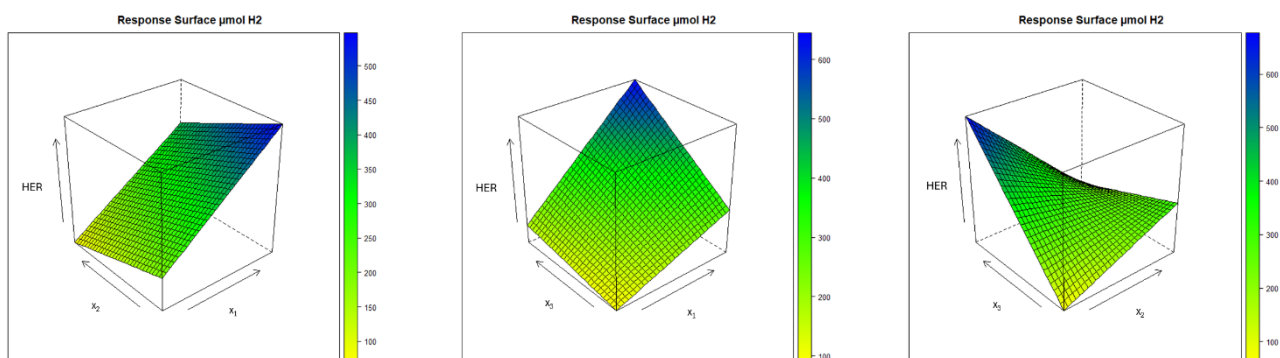

**Fig. S2** Response surfaces obtained by CAT from the experimental results of the H<sub>2</sub> production from glucose aqueous solution.

**Table S4.** Experimental plan and mean HER ( $n=2$ ) observed for each experiment in the rice industry wastewater.

| Exp.# | X <sub>1</sub> , waste dilution (v/v) | X <sub>2</sub> , catalyst concentration (g/L) | X <sub>3</sub> , Pt loading (wt%) | HER |
|-------|---------------------------------------|-----------------------------------------------|-----------------------------------|-----|
| 1     | 1:2                                   | 0.5                                           | 0.5                               | 49  |
| 2     | -                                     | 0.5                                           | 0.5                               | 60  |
| 3     | 1:2                                   | 2                                             | 0.5                               | 26  |
| 4     | -                                     | 2                                             | 0.5                               | 42  |
| 5     | 1:2                                   | 0.5                                           | 3                                 | 67  |
| 6     | -                                     | 0.5                                           | 3                                 | 148 |
| 7     | 1:2                                   | 2                                             | 3                                 | 5   |
| 8     | -                                     | 2                                             | 3                                 | 33  |

**Table S5.** Organic compounds determined in the sample solution before and after photocatalysis.

|                       | Concentration |           |
|-----------------------|---------------|-----------|
|                       | Before        | After     |
| Glucose               | 1540 mg/L     | 122 mg/L  |
| Acetic acid           | 123 mg/L      | 82 mg/L   |
| Formic acid           | 49 mg/L       | 32 mg/L   |
| Furfural              | < 10 μg/L     | 41 μg/L   |
| Methylfurfural        | < 10 μg/L     | < 10 μg/L |
| Hydroxymethylfurfural | < 10 μg/L     | 13 μg/L   |

## Material characterization

The crystal structure of the samples has been characterized by room temperature Cu-radiation XRD acquired with Bruker D2 diffractometer. DRS spectra were acquired in the wavelength range 300-800 nm directly on the powders by using a Jasco V-750 spectrophotometer, equipped with an integrating sphere (Jasco ISV-922). Microstructural characterization of the samples was made using a high-resolution scanning electron microscope (SEM, TESCAN Mira 3) operated at 25 kV. Transmission electron microscopy (TEM) was performed on a ZEISS LIBRA200FE equipped with a high-angle annular dark-field (HAADF) detector for STEM (scanning TEM) mode. The determination of band gap energy by using TAUC PLOT was done by plotting the value of  $(\alpha h\nu)^{1/2}(\text{eV}/\text{cm})^2$  with Energy ( $h\nu$ ), then followed by taking the extrapolation in the linear area across the energy axis in the corresponding graph. The insertion with energy-axis is the estimation of the corresponding energy gap.

## Analytical methods

The measurements of the parameters reported in Table S1 were done following the methods reported in "Standard Methods for the Examination of Water and Wastewaters" APHA Editor, 22<sup>nd</sup> Edition".

Briefly:

- Conductivity was measured by a classic conductivity cell whose constant cell is periodically verified by a standard solution of KCl.
- $\text{Cl}^-$ ,  $\text{NO}_3^-$ ,  $\text{SO}_4^{2-}$ , acetic and formic acids (as acetate and formate) were determined by anion exchange chromatography and chemical suppression of eluent conductivity. A Metrohm ECO IC chromatograph equipped with a conductivity detector using a Metrosep A Supp 5-250/4.0 Metrohm column ( $20 \times 2.1$  mm,  $5 \mu\text{m}$ ). The mobile phase was 3.2 mM  $\text{Na}_2\text{CO}_3$ -1 mM  $\text{NaHCO}_3$  aqueous solution, 0.7 mL/min flow rate.
- $\text{F}^-$  was measured by Ion fluoride selective electrode equipped with a standard calomel reference electrode.
- $\text{Ca}^{2+}$ ,  $\text{Sr}^{2+}$ ,  $\text{Mg}^{2+}$ ,  $\text{K}^+$ ,  $\text{Na}^+$ , Si, Fe, Mn were determined by ICP-OES following the conventional manufacturer instructions; quantification was obtained by the external standard calibration with four standards prepared daily in the in 0,5%  $\text{HNO}_3$  suprapure water solution.
- COD was determined by the amount of dichromate consumed, expressed in terms of its oxygen equivalents, in controlled conditions (see method 5220 B of the Standard Methods for the Examination of Water and Wastewaters "APHA Editor, 22<sup>nd</sup> Edition) by a proper volume of sample.
- Total suspended solids: A well-mixed sample was filtered through a weighed glass-fiber filter and the residue retained on the filter dried to a constant weight at  $105^\circ\text{C}$ .

Glucose, furfural, methylfurfural were quantified by UPLC-MS/QTOF: Agilent Metacarb 87C  $300 \times 7,8$  mm column ( $85^\circ\text{C}$ ), 0.6 mL/min, eluent  $\text{H}_2\text{O}$ ; hydroxymethylfurfural by HPLC-UV: 280 nm, Scharlab Kroma Phase 100 C18 ( $250 \times 4.6$  mm,  $5 \mu\text{m}$ ) column, mobile phase was ACN- $\text{H}_2\text{O}$  (10:90, v/v), 1 mL/min.

The GC-TCD analysis of the photoreactor headspace was carried out by an Agilent 8860 instrument (Agilent Technologies Italia S.p.a., Cernusco s/N, Milan, Italy) equipped with thermal conductivity detector, using a Carbosieve S-II (80/100 mesh) packed column (2 mm i.d., 510 mm length), high-purity argon as the carrier gas (10 mL/min). The temperature program was  $35^\circ\text{C}$  for 3 min, from  $35^\circ\text{C}$  to  $200^\circ\text{C}$  at  $20^\circ\text{C}/\text{min}$ . The temperature of the injection port and the detector was  $100^\circ\text{C}$  and  $140^\circ\text{C}$ , respectively.
